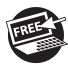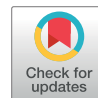

# Errata

**Erratum. A Randomized Controlled Trial Comparing Efficacy and Safety of Insulin Glargine 300 Units/mL Versus 100 Units/mL in Older People With Type 2 Diabetes: Results From the SENIOR Study. Diabetes Care 2018;41:1672–1680**

<https://doi.org/10.2337/dc09-19er08>

*Robert Ritzel, Stewart B. Harris,  
Helen Baron, Hermes Florez,  
Ronan Roussel, Melanie Espinasse,  
Isabel Muehlen-Bartmer, Nianxian Zhang,  
Monica Bertolini, Claire Brulle-Wohlhueter,  
Medha Munshi, and Geremia B. Bolli*

In the article cited above, the ClinicalTrials.gov registration number was incorrect in the footnote section. The correct number is NCT02320721. The online version of this article (<https://doi.org/10.2337/dc18-0168>) has been corrected.
